# Supplementary material
Source: Research Square preprint supplement (doi:10.21203/rs.3.rs-9470025/v1)

Supplementary TBQ and IPS

S1. Differences between patients with AN and HCs

|  | Patients with AN (n = 76) | HC  (n = 77) |  |  |  |
| --- | --- | --- | --- | --- | --- |
|  | Mean (SD) | Mean (SD) | t | p | Cohen’s d |
| Age | 25.5 (8.1) | 25.7 (2.5) | .225 | .822 | .038 |
| BMI | 16.3 (3.5) | 21.3 (2.7) | 9.353 | **<.001** | 1.586 |
| EDEQ-restrain | 4.2 (1.7) | 0.6 (0.9) | 15.523 | **<.001** | -2.619 |
| EDEQ_food | 3.6 (1.4) | 0.5 (0.8) | 15.818 | **<.001** | -2.670 |
| EDEQ_shape | 4.9 (1.3) | 1.7 (1.5) | 13.562 | **<.001** | -2.327 |
| EDEQ_weight | 4.5 (1.5) | 1.2 (1.2) | 14.033 | **<.001** | -2.390 |
| EDEQ_tot | 4.3 (1.3) | 1.0 (0.9) | 16.535 | **<.001** | -2.807 |
| BDI | 20.7 (6.8) | 4.7 (4.4.) | 16.164 | **<.001** | 2.780 |
| STAI_state | 61.2 (9.8) | 42.8 (11.3) | 10.029 | **<.001** | -1.745 |
| STAI_trait | 63 (6.8) | 45.3 (8.3) | 13.309 | **<.001** | -2.757 |
| BSQ | 141.9 (41.9) | 65.1 (28.1) | 12.258 | **<.001** | -2.161 |
| BCQ | 72.2 (25.8) | 39.5 (12.3) | -9.091 | **<.001** | -1.644 |
| BIAQ | 49.3 (18.3) | 19.1 (7.6) | 12.145 | **<.001** | -2.183 |

BMI = Body Mass Index; EDEQ = Eating Disorder Examination Questionnaire; BDI = Beck Depression Inventory; STAI = State-Trait Anxiety Inventory; BSQ = Body Shape Questionnaire; BCQ = Body Checking Questionnaire; BIAQ = Body Image Avoidance Questionnaire.

S2. Differences between patients with AN and HCs in IPS task


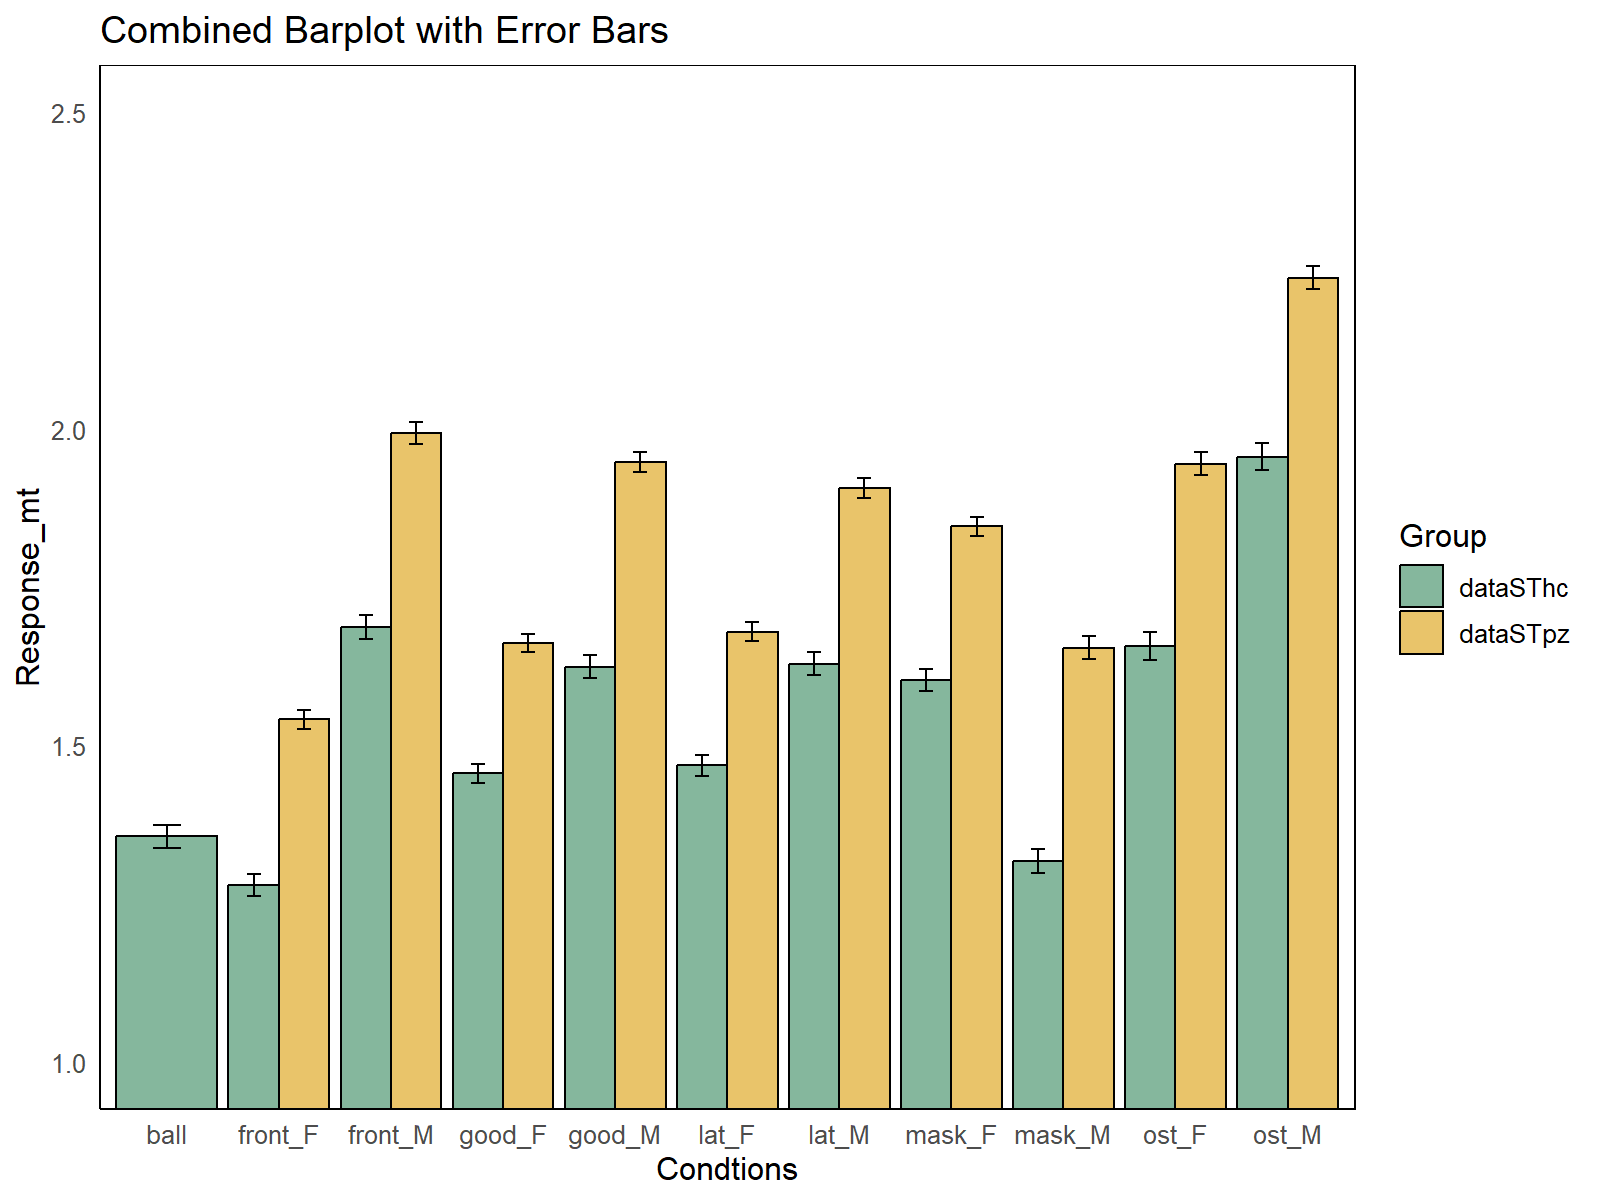

Supplement: Supplementary file 1 [file 2870096c19b1f0d8cff35e92.docx]
